# Supplementary material for: ADAMTS6 suppresses tumor progression via the ERK signaling pathway and serves as a prognostic marker in human breast cancer
Source: PubMed Central journal article supplement (PMC5308650; doi:10.18632/oncotarget.11341), 2016-08-17
Supplement: oncotarget-07-61273-s001.pdf [file oncotarget-07-61273-s001.pdf]

## ADAMTS6 suppresses tumor progression via the ERK signaling pathway and serves as a prognostic marker in human breast cancer

### Supplementary Materials

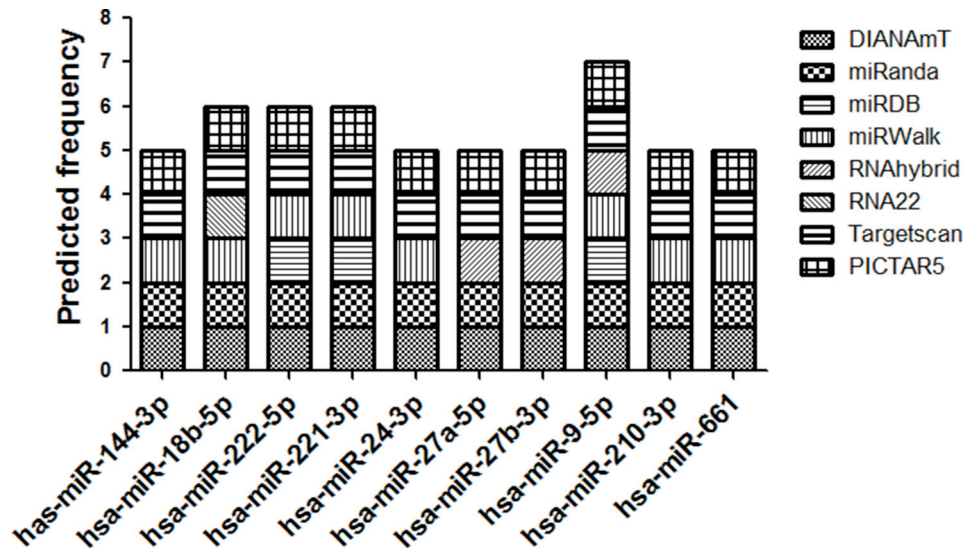

Supplementary Figure S1: Predicted frequencies of candidate miRNAs by online bioinformatics databases (DIANAmT, miRanda, miRDB, miRWalk, RNAhybrid, RNA22, Targetscan, PICTAR5 ) in BC.

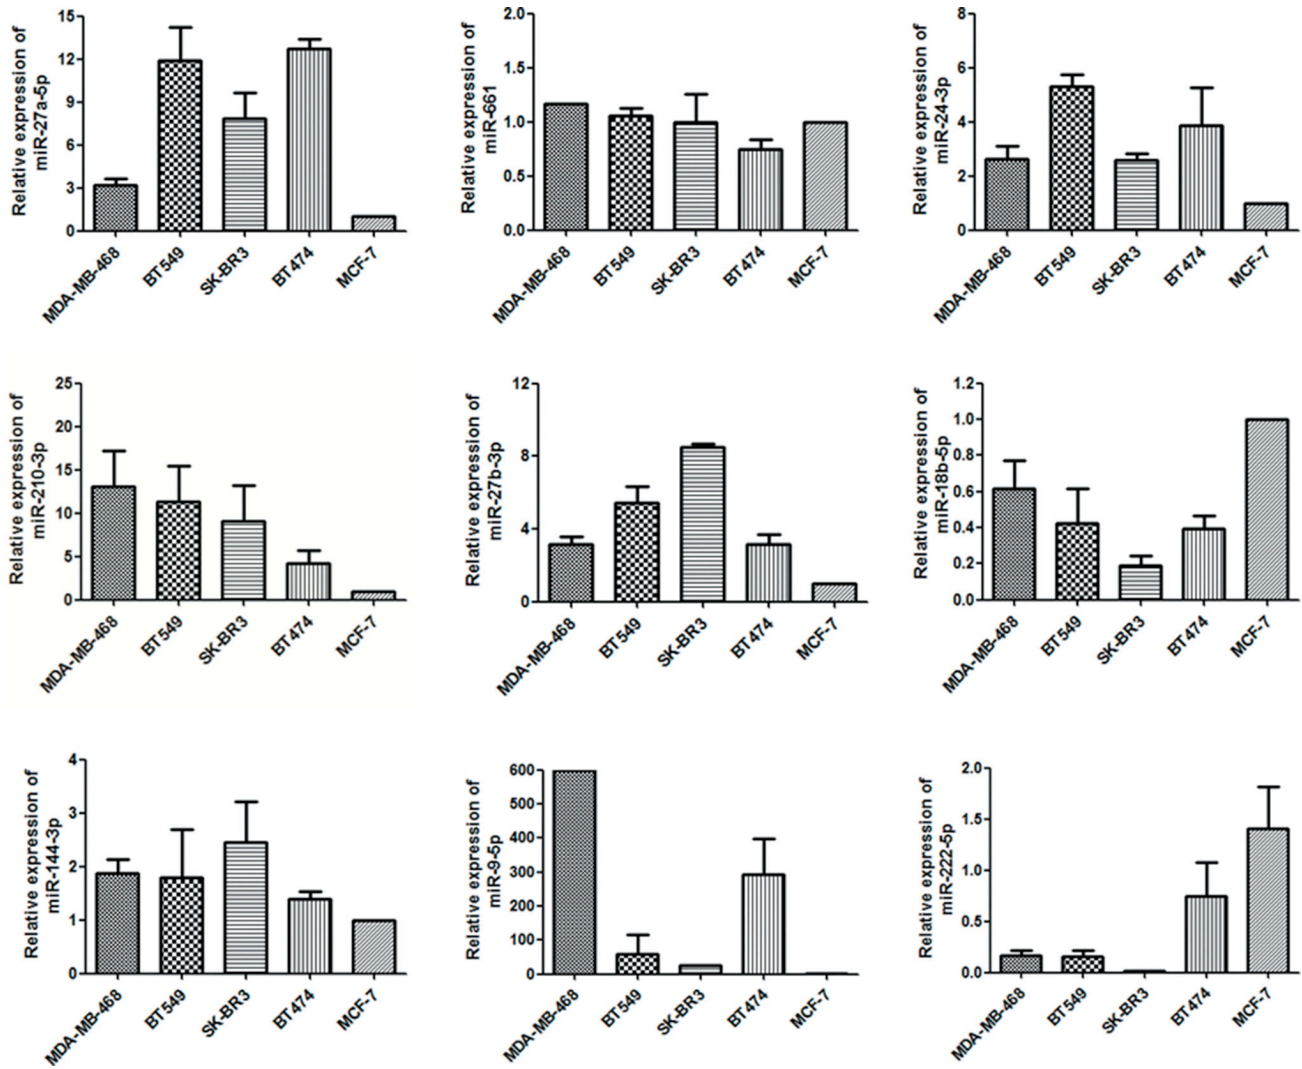

Supplementary Figure S2: The expression of candidate miRNAs was examined using qPCR in five BC cell lines.

## A MCF-7

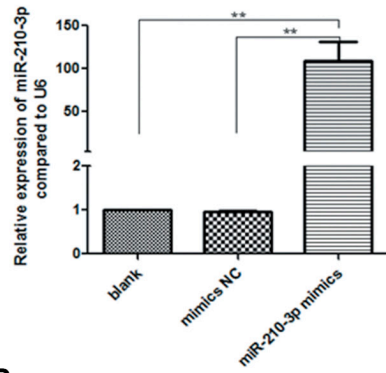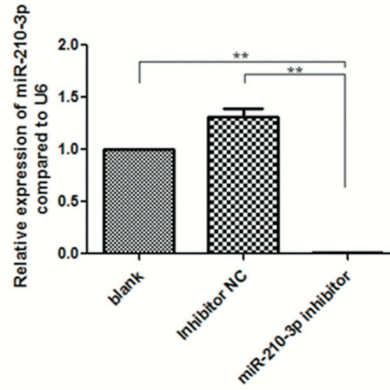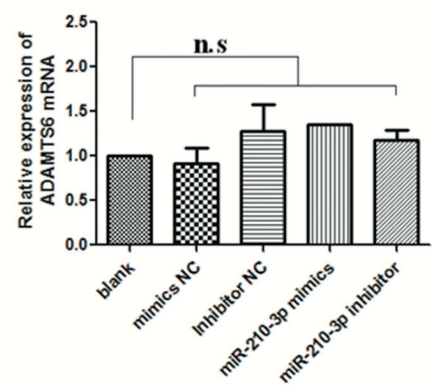

## B MDA-MB-468

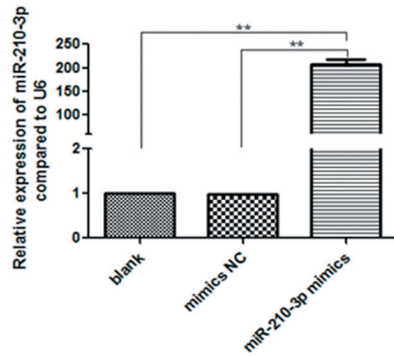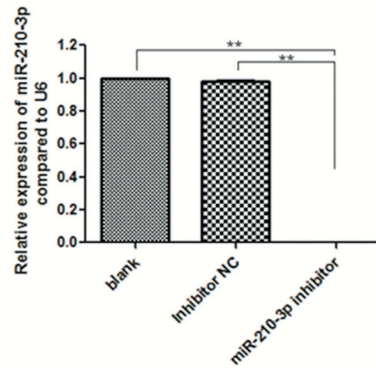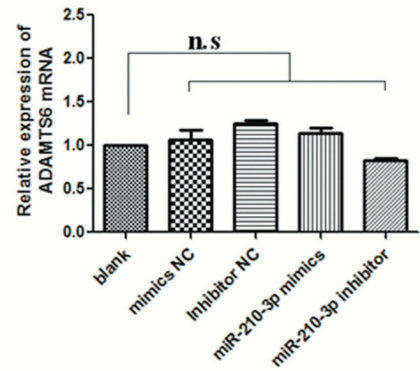

**Supplementary Figure S3: Cells were transfected with miR-210-3p mimics or miR-210-3p inhibitor and their respective negative controls.** After 48 h incubation, cells were treated as depicted in §Methods. MiR-210-3p expression (left and middle), corresponding ADAMTS6 mRNA expression (right) was detected in (A) MCF-7 and (B) MDA-MB-468 cells.

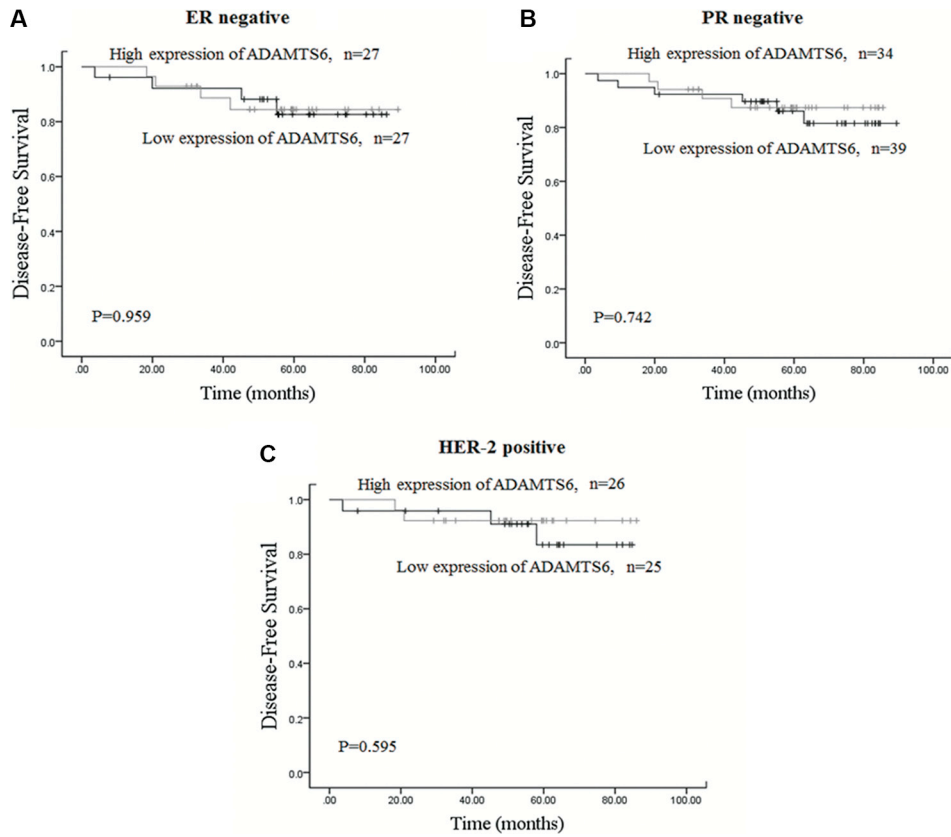

Supplementary Figure S4: Kaplan-Meier curves for 5-year DFS according to subgroup survival analysis of (A) ER-negative, (B) PR-negative and (C) HER2- positive status based on ADAMTS6 expression.

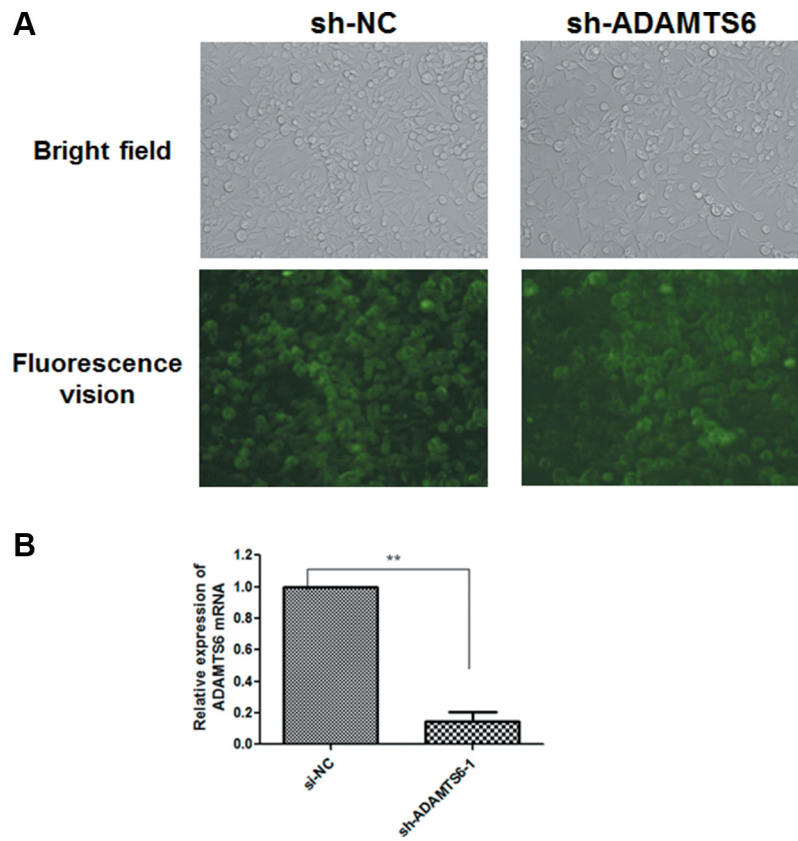

**Supplementary Figure S5:** (A) The transduction efficiency of the GV112 lentivirus sh-NC or sh-ADAMTS6 infected MCF-7 cells were > 90% (200× magnification). (B) ADAMTS6 mRNA expression was detected by qPCR.

**Supplementary Table S1. Basic clinicoathological parameters of the patients and their correlation with ADAMTS6 expression in BC**

| Parameters                   | All<br><i>n</i> = 182 |         | ADAMTS6-high<br><i>n</i> = 90 (49.45%) |         | ADAMTS6-low<br><i>n</i> = 92 (50.55%) |         | <i>P</i> value |
|------------------------------|-----------------------|---------|----------------------------------------|---------|---------------------------------------|---------|----------------|
|                              | No.                   | (%)     | No.                                    | (%)     | No.                                   | (%)     |                |
| <b>Age</b>                   |                       |         |                                        |         |                                       |         | 0.185          |
| Median (range)               | 48                    | (27–80) | 50                                     | (31–77) | 47                                    | (27–80) |                |
| ≤ 50                         | 102                   | (56.0)  | 46                                     | (45.1)  | 56                                    | (54.9)  |                |
| > 50                         | 80                    | (40.0)  | 44                                     | (55.0)  | 36                                    | (45.0)  |                |
| <b>Tumor size (cm)</b>       |                       |         |                                        |         |                                       |         | 0.367          |
| ≤ 2                          | 77                    | (42.3)  | 35                                     | (45.5)  | 42                                    | (54.5)  |                |
| > 2–5                        | 92                    | (50.5)  | 50                                     | (54.3)  | 42                                    | (45.7)  |                |
| > 5                          | 13                    | (7.2)   | 5                                      | (38.5)  | 8                                     | (61.5)  |                |
| <b>Lymph node metastasis</b> |                       |         |                                        |         |                                       |         | 0.303          |
| No                           | 98                    | (53.8)  | 45                                     | (45.9)  | 53                                    | (54.1)  |                |
| Yes                          | 84                    | (46.2)  | 45                                     | (53.6)  | 39                                    | (46.4)  |                |
| <b>TNM stage</b>             |                       |         |                                        |         |                                       |         | 0.462          |
| I                            | 47                    | (25.8)  | 20                                     | (42.6)  | 27                                    | (57.4)  |                |
| II                           | 95                    | (52.2)  | 50                                     | (52.6)  | 45                                    | (47.4)  |                |
| III                          | 37                    | (20.3)  | 20                                     | (54.1)  | 17                                    | (45.9)  |                |
| Unknown                      | 3                     | (1.6)   | 0                                      | (0.0)   | 3                                     | (100.0) |                |
| <b>Histologic grade</b>      |                       |         |                                        |         |                                       |         | 0.156          |
| I                            | 6                     | (3.3)   | 5                                      | (83.3)  | 1                                     | (16.7)  |                |
| II                           | 46                    | (25.3)  | 26                                     | (56.5)  | 20                                    | (43.5)  |                |
| III                          | 96                    | (52.7)  | 45                                     | (46.9)  | 51                                    | (53.1)  |                |
| Unknown                      | 34                    | (18.7)  | 14                                     | (41.2)  | 20                                    | (58.8)  |                |
| <b>Molecular subtype</b>     |                       |         |                                        |         |                                       |         | 0.561          |
| Luminal A                    | 19                    | (10.5)  | 12                                     | (63.2)  | 7                                     | (36.8)  |                |
| Luminal B                    | 98                    | (53.8)  | 47                                     | (48.0)  | 51                                    | (52.0)  |                |
| Triple-negative              | 15                    | (8.2)   | 6                                      | (40.0)  | 9                                     | (60.0)  |                |
| HER2-type                    | 26                    | (14.3)  | 13                                     | (50.0)  | 13                                    | (50.0)  |                |
| Unknown                      | 24                    | (13.2)  | 12                                     | (50.0)  | 12                                    | (50.0)  |                |
| <b>subtypes</b>              |                       |         |                                        |         |                                       |         | 1.000          |
| Negative                     | 54                    | (29.7)  | 27                                     | (50.0)  | 27                                    | (50.0)  |                |
| Positive                     | 126                   | (69.3)  | 63                                     | (50.0)  | 63                                    | (50.0)  |                |
| Unknown                      | 2                     | (0.1)   | 0                                      | (0.0)   | 2                                     | (100.0) |                |
| <b>PR</b>                    |                       |         |                                        |         |                                       |         | 0.448          |
| Negative                     | 73                    | (40.1)  | 34                                     | (37.8)  | 39                                    | (43.3)  |                |
| Positive                     | 107                   | (58.8)  | 56                                     | (62.2)  | 51                                    | (56.7)  |                |
| Unknown                      | 2                     | (1.1)   | 1                                      | (50.0)  | 1                                     | (50.0)  |                |
| <b>HER-2</b>                 |                       |         |                                        |         |                                       |         | 0.702          |
| Negative                     | 111                   | (61.0)  | 53                                     | (67.1)  | 58                                    | (69.9)  |                |
| Positive                     | 51                    | (28.0)  | 26                                     | (32.9)  | 25                                    | (30.1)  |                |
| Uncertainty                  | 20                    | (11.0)  | 11                                     | (55.0)  | 9                                     | (45.0)  |                |
| <b>Ki67</b>                  |                       |         |                                        |         |                                       |         | 0.817          |
| < 14%                        | 31                    | (17.0)  | 15                                     | (16.7)  | 16                                    | (18.0)  |                |
| ≥ 14%                        | 148                   | (81.3)  | 75                                     | (83.3)  | 73                                    | (82.0)  |                |
| Unknown                      | 3                     | (1.7)   | 0                                      | (0.0)   | 3                                     | (100.0) |                |

## Supplementary Table S2: Sequences of RNA and DNA oligonucleotides

| Name                       | Sense Strand/Sense Primer(5'-3')                                   | Antisense Strand/Antisense Primer (5'-3') |
|----------------------------|--------------------------------------------------------------------|-------------------------------------------|
| <b>Primers for RT-qPCR</b> |                                                                    |                                           |
| ADAMTS6                    | ATC ACT CGA ACT GGC AGT GG                                         | GTC TTT GGA CAC CTC CAG CA                |
| GAPDH                      | ATCATCAGCAATGCCTCC                                                 | AGTCCTTCCACGATACCAA                       |
| <b>microRNA mimics</b>     |                                                                    |                                           |
| anti-miR-221-3p            | AGC UAC AUU GUC UGC UGG GUU UC                                     | AAC CCA GCA GAC AAU GUA GCU UU            |
| anti-miR-210-3p            | CUG UGC GUG UGA CAG CGG CUGA                                       | AGC CGC UGU CAC ACG CAC AGU U             |
| <b>microRNA inhibitor</b>  |                                                                    |                                           |
| anti-miR-221-3p            | GAA ACC CAG CAG ACA AUG UAG CU                                     |                                           |
| anti-miR-210-3p            | UCA GCC GCU GUC ACA CGC ACA G                                      |                                           |
| <b>siRNA Duplexes</b>      |                                                                    |                                           |
| si-ADAMTS6                 | GGA CUA CAG UGG UUG UUU A dTdT                                     | UAA ACA ACC ACU GUA GUC C dTdT            |
| <b>shRNA Duplexes</b>      |                                                                    |                                           |
| sh-ADAMTS6                 | Sense: GGACTACAGTGGTTGTTTA TTCAAGAGA TAAACAACCACTGTAGTCC TTTTT     |                                           |
|                            | Antisense: AAAAA GGACTACAGTGGTTGTTTA TCTCTTGAA TAAACAACCACTGTAGTCC |                                           |
